# Supplementary material
Source: HighWire-hosted journal article supplement (https://tsaco.bmj.com/content/3/1/e000202)
Supplement: inline-supplementary-material-2 [file inline-supplementary-material-2.pdf]

**Search language, designed for use in Pubmed:**

((("emergency treatment" [mesh] OR "emergency medical services" [mesh] OR emergency [ti] OR trauma\* [ti] OR acute [ti] OR "acute disease" [mesh] OR "Amputation, Traumatic" [mesh] OR "Blast Injuries" [mesh] OR "Crush Injuries" [mesh] OR "Multiple Trauma" [mesh] OR "Wounds, Penetrating" [mesh]) AND (operativ\* [ti] OR surger\* [ti] OR "surgery" [sh] OR surgery [ti] OR surgical [ti])) AND ("patient reported" [tw] OR "Patient Reported Outcome Measures" [mesh] OR "quality of life" [mesh] OR qol [ti] OR "activities of daily living" [mesh] OR "patient satisfaction" [mesh] OR "patient satisfaction" [tw] OR proms [tw] OR "patient values" [tw] OR "patient's wishes" [tw] OR "Adaptation, Psychological" [mesh] OR biopsychosocial [tw] OR "psychometrics" [mesh] OR psychometr\* [ti] OR "return to sport" [mesh] OR "return to work" [tw] OR "back to work" [tw] OR "disability evaluation" [tw] OR "self reported" [tw] ) AND english [lang] NOT ("animals" [mesh] NOT "humans" [mesh]))
